# Supplementary material for: Coordination polymers built up from an s-tetrazine derived ligand and rare-earth ions: from a sequential dimensional expansion to organic–inorganic energy transfer
Source: Royal Society of Chemistry journal article supplement (doi:10.1039/c8dt01268g), 2018-01-01
Supplement: c8dt01268g1.pdf [file c8dt01268g1.pdf]

*Supporting information*

**Coordination polymers built up from a *s*-tetrazine derived ligand and rare earths: from a sequential dimensional expansion to organic-inorganic energy transfer**

*Paul Rouschmeyer,<sup>1,2</sup> Nathalie Guillou,<sup>1</sup> Christian Serre,<sup>1</sup> Gilles Clavier,<sup>2</sup> Clémence Allain,<sup>2\*</sup> Thomas Devic<sup>1,3\*</sup>*

<sup>1</sup> Institut Lavoisier, UMR 8180 CNRS - U. Versailles St. Quentin, Université Paris-Saclay, 45 avenue des Etats-Unis, 78035 Versailles, France.

<sup>2</sup> PPSM, UMR 8531 CNRS - ENS Cachan, Université Paris-Saclay, 61 avenue du président Wilson, 94235 Cachan, France.

<sup>3</sup> Institut des Matériaux Jean Rouxel (IMN), Université de Nantes, CNRS UMR 6502, 2 rue de la Houssinière, BP 32229, 44322 Nantes cedex 3, France.

E-mail: callain@ppsm.ens-cachan.fr, thomas.devic@cncrs-imn.fr

|                                            |            |
|--------------------------------------------|------------|
| <b>1. Synthesis</b>                        | <b>S2</b>  |
| <b>2. X-ray diffraction (XRD) analysis</b> | <b>S4</b>  |
| <b>3. Infrared (IR) spectroscopy</b>       | <b>S13</b> |
| <b>4. Thermogravimetric analysis (TGA)</b> | <b>S15</b> |
| <b>5. Elemental analysis</b>               | <b>S15</b> |
| <b>5. Optical experiments</b>              | <b>S16</b> |

## 1. Synthesis

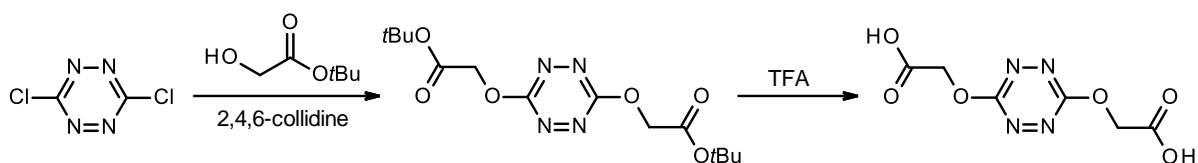

### *tert*-butyl-(*s*-tetrazine)-3,6-diglycolate

*tert*-butyl 2-hydroacetate<sup>[1]</sup> and 3,6-dichlorotetrazine<sup>[2]</sup> were prepared as previously described. 1.0 g (6.6 mmol, 1 eq) of 3,6-dichlorotetrazine was dissolved in 2mL of dichloromethane, and 1.93 g (14.5 mmol, 2.2eq.) of *tert*-butyl 2-hydroacetate were added. 3.11mL (15.9 mmol, 2.4eq.) of 2,4,6-trimethylpyridine were then slowly added (caution, exothermic reaction), and the mixture was stirred at room temperature for 3 days. The mono and bis-substituted tetrazines were subsequently separated by silica gel chromatography (eluent dichloromethane : petroleum ether 1 : 1). The unreacted alcohol was finally eliminated by evaporation at 50°C under vacuum, leading to *tert*-butyl-(*s*-tetrazine)-3,6-diglycolate as a red powder. Yield: 1.30 g (3,8 mmol, 57%).

<sup>1</sup>H NMR (400 MHz, CDCl<sub>3</sub>): δ = 5.00 (s, 4H), 1.43(s, 18H)

<sup>13</sup>C NMR (100 MHz, CDCl<sub>3</sub>): δ = 166.1, 166.0, 83.4; 65.41; 28.1

### *3,6-diglycolic-1,2,4,5-tetrazine acid or H<sub>2</sub>OTz*

1.30 g (3.8 mmol) of *tert*-butyl-(*s*-tetrazine)-3,6-diglycolate was dissolved in 50 mL of dichloromethane. 50 mL of trifluoroacetic acid were slowly added and the mixture was stirred at room temperature overnight. The product was then concentrated under vacuum, washed with diethylether to afford a pink powder. Yield: 0.80 g (3.4 mmol, 89%). Recrystallization in acetone afforded crystals suitable for single crystal XRD analysis (see below).

<sup>1</sup>H NMR (400MHz, MeOD): δ = 5.14

<sup>13</sup>C NMR (100 MHz, MeOD): δ = 170.7, 167.4, 65.8

HRMS (ESI): calc. for C<sub>6</sub>H<sub>7</sub>N<sub>4</sub>O<sub>6</sub> [M+H<sup>+</sup>] 231.0366, found 231.0364

MOFs syntheses were first carried out in autoclave reactors under static conditions. While MIL-162 prepared from nitrate salts could be obtained in a pure form, residual  $\text{Ln}(\text{OH})_3$  was often found in MIL-164 and MIL-165. These two solids were ultimately obtained in a pure form when the syntheses were performed in round bottom flasks under stirring.

The optimized synthesis conditions are given below.

***MIL-162(Ln) (Ln=La, Pr, Nd, Sm, Eu)***

46 mg (0.2 mmol; 1eq.) of  $\text{H}_2\text{OTz}$ , 87 mg (0.2 mmol; 1eq.) of  $\text{Ln}(\text{NO}_3)_3 \cdot n\text{H}_2\text{O}$  and 0.5 mL of N,N-dimethylformamide (DMF) were mixed in a 1.5 mL teflon lined autoclave reactor. The reactor was sealed and heated at  $100^\circ\text{C}$  for 72 hours. After cooling down to room temperature, the red solid was recovered by filtration, washed with DMF and dried in air.

***MIL-164(Ln) (Ln=La, Pr, Nd, Sm) or  $\text{LnCl}(\text{OTz})(\text{DMF})_2$***

23 mg (0.1 mmol; 1eq.) of  $\text{H}_2\text{OTz}$ , 21 mg (0.1 mmol; 1eq.) of finely grinded  $\text{Ln}(\text{OH})_3$ , 33.6  $\mu\text{L}$  of a 12 M aqueous HCl solution (0.4 mmol; 4 eq.) and 1 mL of DMF were mixed in a 10 mL round bottom flask. The mixture was heated at  $100^\circ\text{C}$  under stirring for 14 hours. After cooling down to room temperature, the red solid was recovered by filtration, washed with DMF and dried in air.

***MIL-165(Tb) or  $\text{TbCl}(\text{OTz})(\text{DMF})_2$***

92 mg (0.4 mmol; 1eq.) of  $\text{H}_2\text{OTz}$ , 92 mg (0.4 mmol; 1eq.) of finely grinded  $\text{Tb}(\text{OH})_3$ , 135  $\mu\text{L}$  of a 12 M aqueous HCl solution (1.6 mmol; 4 eq.) and 4 mL of DMF were mixed in a 10 mL round bottom flask. The mixture was heated at  $100^\circ\text{C}$  under stirring for 14 hours. After cooling down to room temperature, the red solid was recovered by filtration, washed with DMF and dried in air.

***MIL-166(Tb) or  $\text{Tb}(\text{OTz})_{1.5}(\text{DMF})_2$***

4 mg (0.017 mmol; 1eq.) of  $\text{H}_2\text{OTz}$  was dissolved in 2.5 mL of DMF in a 10 mL round bottom flask. 10 mg (0.017 mmol; 1eq.) of MIL-165(Tb) were added, and the mixture was heated at  $100^\circ\text{C}$  for 14 hours. After cooling down to room temperature, the red solid was recovered by filtration, washed with DMF and dried in air.

## 2. X-ray diffraction (XRD) analysis

### - Powder XRD

X-ray powder diffraction patterns (Figures 2, S1-S5) were measured on flat samples using a high-throughput Bruker D8 Advance diffractometer working on transmission mode, equipped with a focusing Göbel mirror producing CuK $\alpha$  radiation ( $\lambda = 1.5418 \text{ \AA}$ ) and a LynxEye detector.

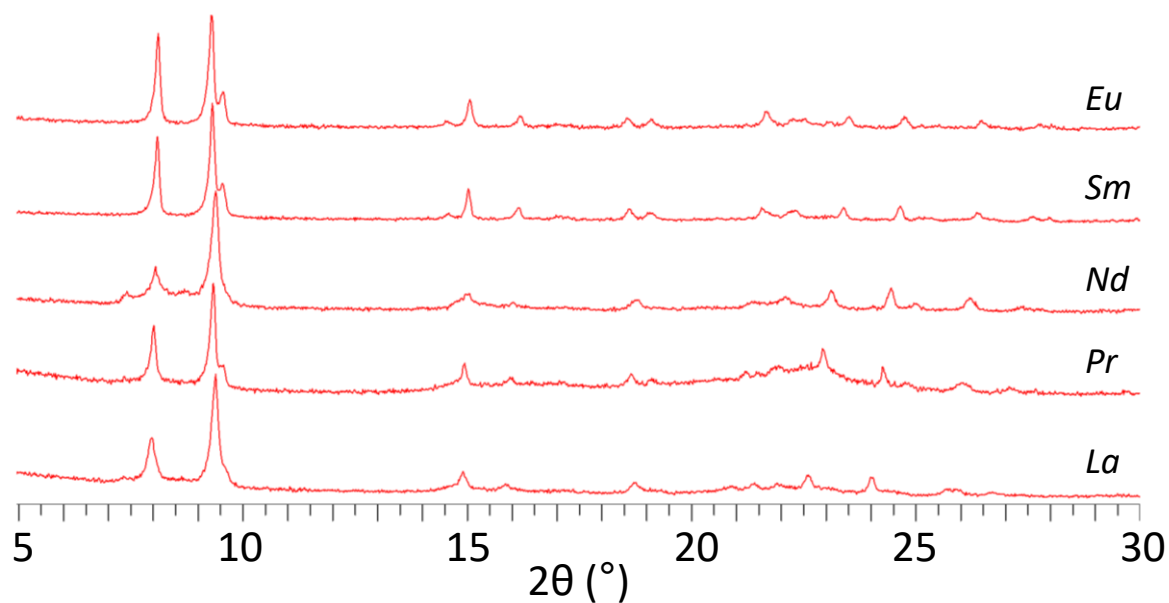

**Figure S1.** XRPD patterns of MIL-162(Ln) for Ln = **La**, **Pr**, **Nd**, **Sm**, **Eu** ( $\lambda = 1.5418 \text{ \AA}$ ). Synthesis conditions:  $\text{H}_2\text{OTZ} / \text{Ln}(\text{NO}_3)_3 \cdot n\text{H}_2\text{O} = 1/1$ ;  $T = 100^{\circ}\text{C}$ .

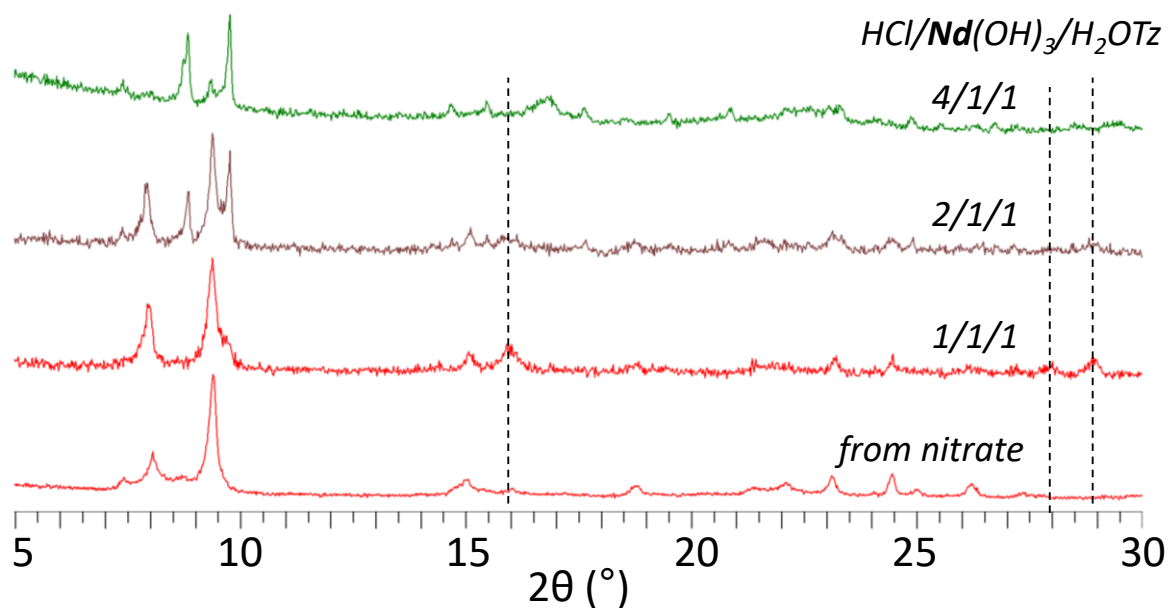

**Figure S2.** Effect of the variation of the HCl/Nd(OH)<sub>3</sub>/H<sub>2</sub>OTz (HCl/M/L) ratios on the XRPD pattern of the resulting products after reaction at 100°C in DMF ( $\lambda = 1.5418 \text{ \AA}$ ). Red = MIL-162; green: MIL-164, brown: mixture of MIL-162 and MIL-164; dashed line: Nd(OH)<sub>3</sub>.

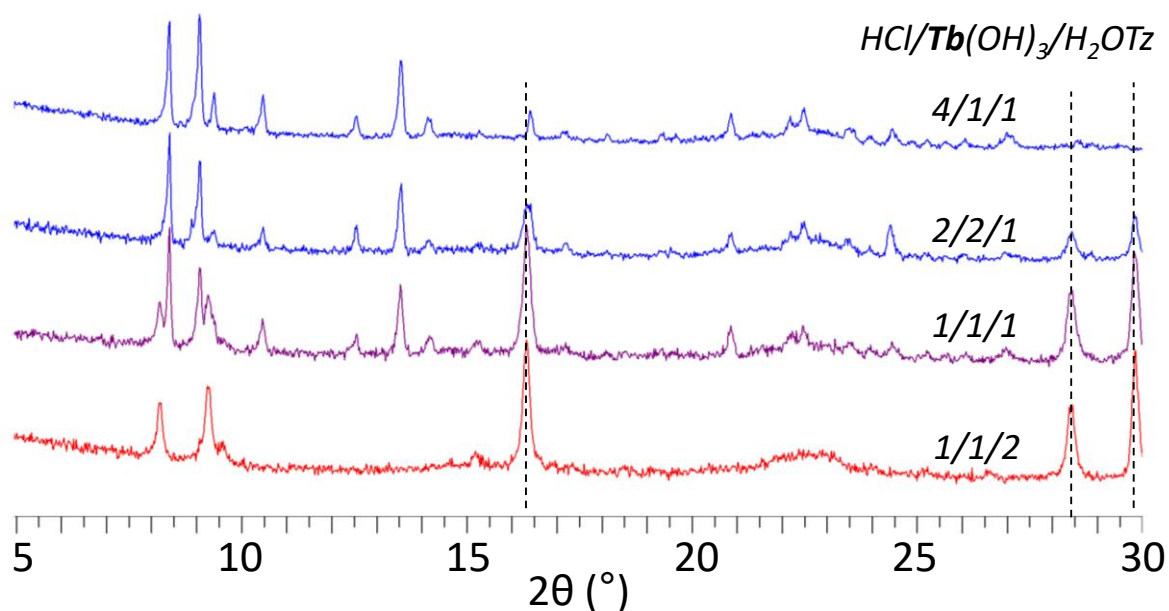

**Figure S3.** Effect of the variation of the HCl/Tb(OH)<sub>3</sub>/H<sub>2</sub>OTz (HCl/M/L) ratios on the XRPD pattern of the resulting products after reaction at 100°C in DMF ( $\lambda = 1.5406 \text{ \AA}$ ). Red = MIL-162; blue: MIL-165, violet: mixture of MIL-162 and MIL-165; dashed line: Tb(OH)<sub>3</sub>.

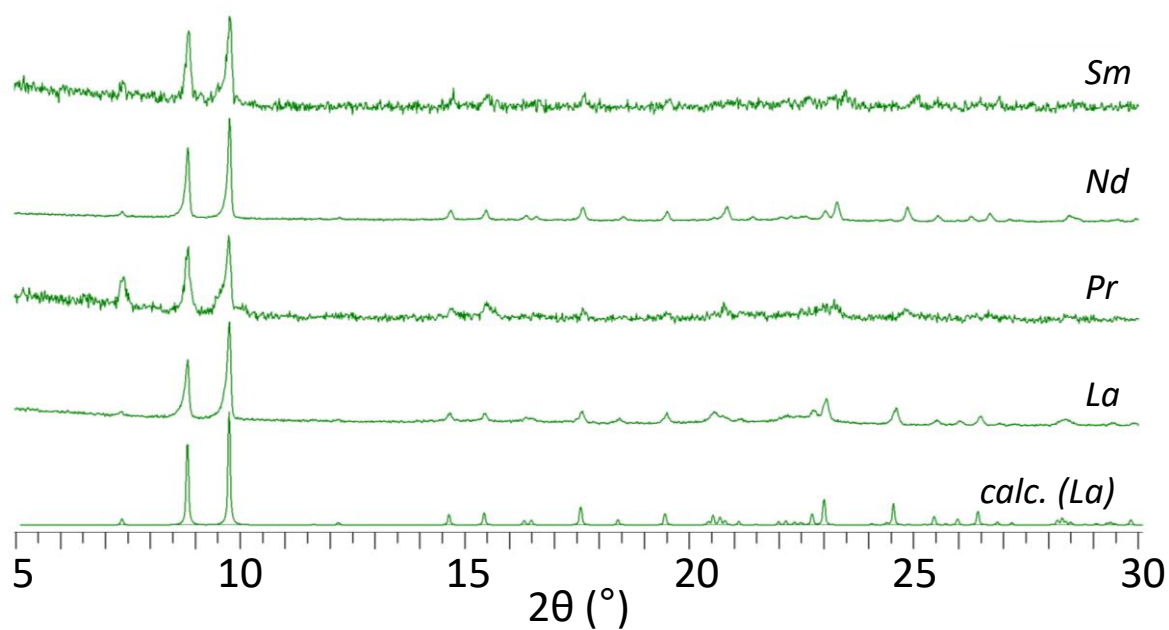

**Figure S4.** XRPD patterns of MIL-164(Ln) for Ln = **La**, **Pr**, **Nd**, **Sm** ( $\lambda = 1.5418 \text{ \AA}$ ). Synthesis conditions:  $\text{H}_2\text{OTZ} / \text{Ln}(\text{OH})_3/\text{HCl} = 1/1/4$ ;  $T = 100^\circ\text{C}$ .

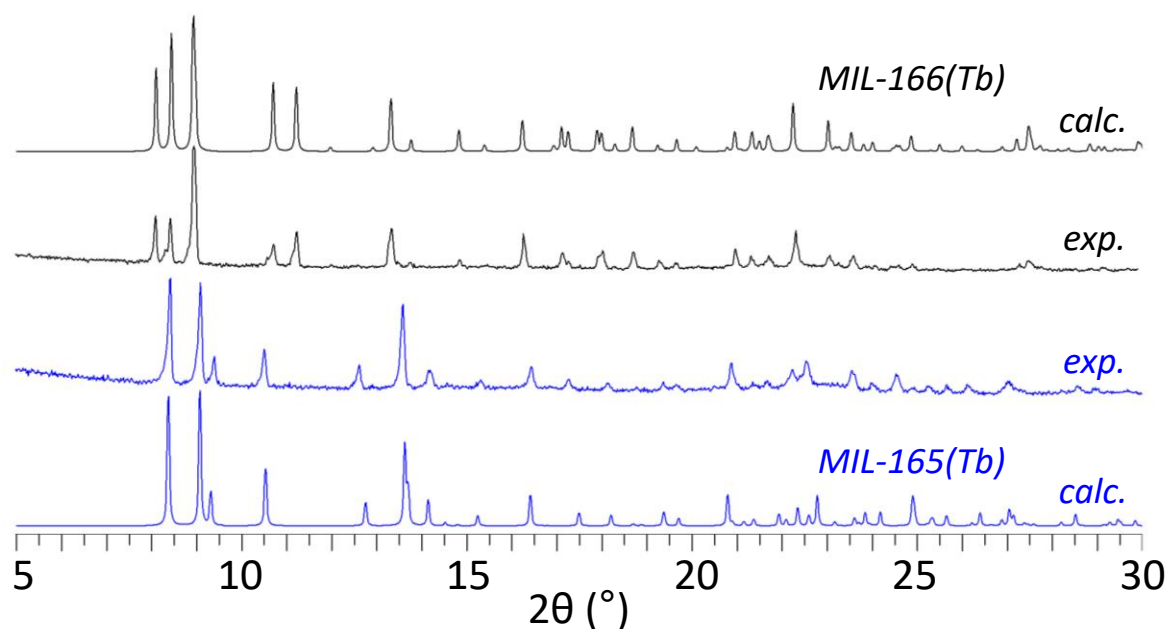

**Figure S5.** Comparison of the XRPD patterns of MIL-165(Tb) and MIL-166(Tb) ( $\lambda = 1.5418 \text{ \AA}$ ).

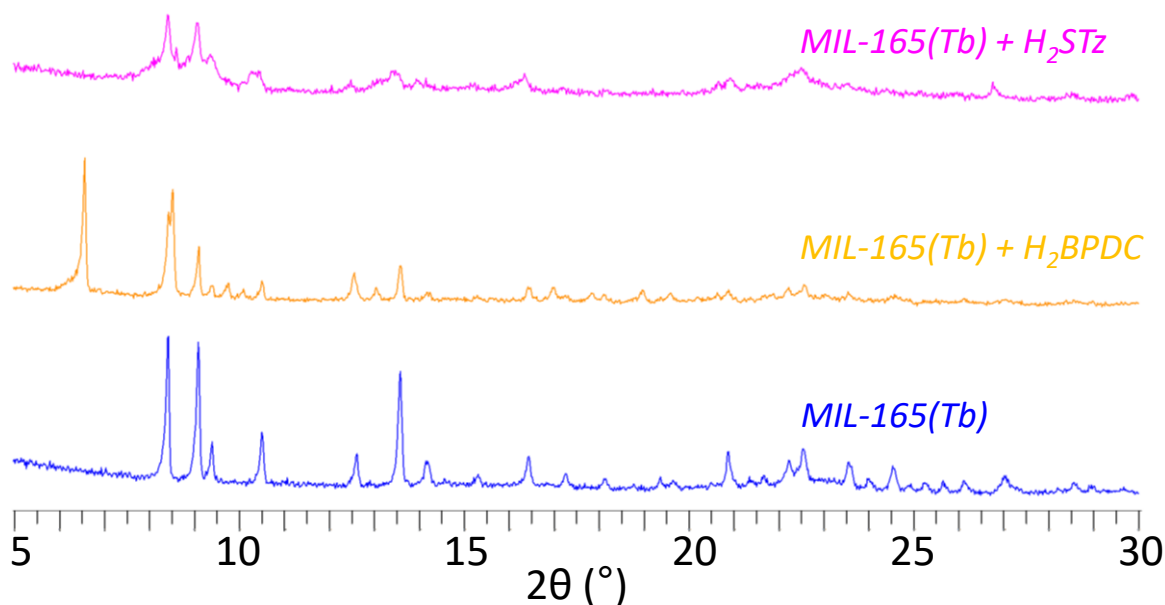

**Figure S6.** Comparison of the XRPD patterns of MIL-165(Tb) before and after exposure to 1 equivalent of 3,6-dithioglycolic-1,2,4,5-tetrazine acid (H<sub>2</sub>STz) and 4,4'-biphenyldicarboxylic acid (or H<sub>2</sub>BPDC, pink) in DMF at 100°C for 14 hrs ( $\lambda = 1.5418 \text{ \AA}$ ).

- *Single crystal XRD*

Crystals of H<sub>2</sub>OTz, MIL-164(La) and MIL-166(Tb) were analyzed at 293(2) K whereas MIL-165(Tb) was analyzed at 149(2) K, all using a Bruker Nonius X8 APEX diffractometer equipped with a CCD area detector. SAINT software was used to integrate and scale intensities and a semi-empirical absorption correction (SADABS) were applied on the basis of multiple scans of equivalent reflections. The structures were solved by direct methods using SHELXS-97 and refined with the full matrix least squares routine SHELXL-2014/7 or SHELX-2016/6.<sup>[3]</sup> For of H<sub>2</sub>OTz, MIL-164(La) and MIL-166(Tb), all non H-atoms were refined anisotropically. The weak diffracting power of the crystals of MIL-165(Tb) precluded the collection of a good dataset even at low temperature (here 149(2) K), and attempts to grow larger crystals failed. For this particular solid, few atoms were then refined isotropically, namely all non O-atoms of the solvent molecules, as well as one O and one C of the carboxylate group on OTz. For MIL-166, unbound disordered solvent molecules were discarded using the SQUEEZE procedure.<sup>[4]</sup> H-atoms were added as rigid bodies, except the acidic H-atom in H<sub>2</sub>OTz which was located on the difference Fourier map.

CCDC 1833257 (MIL-164(La)), 1833258 (MIL-165(Tb)), 1833259 (MIL-166(Tb)), 1833260 (H<sub>2</sub>OTz) contain the supplementary crystallographic data for this paper. These data can be obtained free of charge from the Cambridge Crystallographic Data Centre via <http://www.ccdc.cam.ac.uk/Community/Requestastructure>. Crystallographic and refinements parameters are summarized in Table S1.

**Table S1.** Crystallographic data and refinement parameters for H<sub>2</sub>OTz, MIL-164(La), MIL-165(Tb) and MIL-166(Tb).

| Compound                                      | H <sub>2</sub> OTz                                                                             | MIL-164(La)<br>La(OTz)Cl(DMF) <sub>2</sub>                                                       | MIL-165(Tb)<br>Tb(OTz)Cl(DMF) <sub>2</sub>                                                                                                  | MIL-166(Tb)<br>Tb(OTz) <sub>1.5</sub> (DMF) <sub>2</sub>                                                                                             |
|-----------------------------------------------|------------------------------------------------------------------------------------------------|--------------------------------------------------------------------------------------------------|---------------------------------------------------------------------------------------------------------------------------------------------|------------------------------------------------------------------------------------------------------------------------------------------------------|
| Empirical formula                             | C <sub>6</sub> H <sub>6</sub> N <sub>4</sub> O <sub>6</sub>                                    | C <sub>12</sub> H <sub>18</sub> ClLaN <sub>6</sub> O <sub>8</sub>                                | C <sub>12</sub> H <sub>18</sub> ClN <sub>6</sub> O <sub>8</sub> Tb                                                                          | C <sub>15</sub> H <sub>20</sub> N <sub>8</sub> O <sub>11</sub> Tb                                                                                    |
| Formula weight<br>(g·mol <sup>-1</sup> )      | 230.15                                                                                         | 548.67                                                                                           | 568.69                                                                                                                                      | 647.31                                                                                                                                               |
| Temperature (K)                               | 293(2)                                                                                         | 293(2)                                                                                           | 149(2)                                                                                                                                      | 293(2)                                                                                                                                               |
| Wavelength (Å)                                | 0.71073                                                                                        | 0.71073                                                                                          | 0.71073                                                                                                                                     | 0.71073                                                                                                                                              |
| Crystal system                                | monoclinic                                                                                     | monoclinic                                                                                       | triclinic                                                                                                                                   | triclinic                                                                                                                                            |
| Space group                                   | <i>P</i> 2 <sub>1</sub> / <i>n</i>                                                             | <i>P</i> 2 <sub>1</sub> / <i>c</i>                                                               | <i>P</i> -1                                                                                                                                 | <i>P</i> -1                                                                                                                                          |
| Unit cell<br>dimensions (Å)                   | <i>a</i> = 4.6883(2)<br><i>b</i> = 10.7516(5)<br><i>c</i> = 8.7635(4)<br><i>β</i> = 95.497(3)° | <i>a</i> = 12.5822(5)<br><i>b</i> = 18.3349(6)<br><i>c</i> = 8.7335(3)<br><i>β</i> = 104.582(2)° | <i>a</i> = 8.443(5)<br><i>b</i> = 10.802(6)<br><i>c</i> = 11.764(8)<br><i>α</i> = 64.44(2)°<br><i>β</i> = 84.15(3)°<br><i>γ</i> = 89.13(4)° | <i>a</i> = 10.177(3)<br><i>b</i> = 11.787(6)<br><i>c</i> = 12.028(3)<br><i>α</i> = 113.632(13)°<br><i>β</i> = 92.422(17)°<br><i>γ</i> = 102.029(14)° |
| Volume (Å <sup>3</sup> )                      | 439.71(3)                                                                                      | 1949.86(12)                                                                                      | 962.2(10)                                                                                                                                   | 1280.0(7)                                                                                                                                            |
| Z, calculated<br>density (g·cm <sup>3</sup> ) | 2,1.738                                                                                        | 4,1.869                                                                                          | 2,1.963                                                                                                                                     | 2,1.680                                                                                                                                              |
| Adsorption<br>coefficient (mm <sup>-1</sup> ) | 0.157                                                                                          | 2.381                                                                                            | 3.867                                                                                                                                       | 2.828                                                                                                                                                |
| F(000)                                        | 236                                                                                            | 1080                                                                                             | 556                                                                                                                                         | 638                                                                                                                                                  |
| Crystal size (mm <sup>3</sup> )               | 0.25 x 0.16 x 0.08                                                                             | 0.08 x 0.04 x 0.02                                                                               | 0.2 x 0.05 x 0.005                                                                                                                          | 0.2 x 0.06 x 0.06                                                                                                                                    |
| Theta range for data<br>collection            | 3.007° - 38.602°                                                                               | 2.008° - 30.532°                                                                                 | 2.091° - 25.118°                                                                                                                            | 1.946° - 26.695°                                                                                                                                     |
| Limiting indices                              | -7 ≤ <i>h</i> ≤ 8<br>-18 ≤ <i>k</i> ≤ 15<br>-14 ≤ <i>l</i> ≤ 15                                | -17 ≤ <i>h</i> ≤ 17<br>-26 ≤ <i>k</i> ≤ 25<br>-12 ≤ <i>l</i> ≤ 12                                | -10 ≤ <i>h</i> ≤ 10<br>-12 ≤ <i>k</i> ≤ 12<br>-14 ≤ <i>l</i> ≤ 13                                                                           | -11 ≤ <i>h</i> ≤ 12<br>-13 ≤ <i>k</i> ≤ 14<br>-15 ≤ <i>l</i> ≤ 14                                                                                    |



|                                                 |                                |                                 |                                 |                                |
|-------------------------------------------------|--------------------------------|---------------------------------|---------------------------------|--------------------------------|
| Reflections collected / unique                  | 7504/2491<br>[R(int) = 0.0215] | 29902/5967<br>[R(int) = 0.1284] | 17158/3317<br>[R(int) = 0.3552] | 9787/4966<br>[R(int) = 0.3080] |
| Refinement method                               | full-matrix least squares      |                                 |                                 |                                |
| Data / Restraints / Parameters                  | 2491/0/76                      | 5967/0/257                      | 3317/207/10                     | 4966/320/2                     |
| Goodness of fit on F <sup>2</sup>               | 1.088                          | 1.012                           | 0.949                           | 0.845                          |
| Final R indices [I > 2σ(I)]                     | R1 = 0.0453<br>wR2 = 0.1337    | R1 = 0.0594<br>wR2 = 0.0887     | R1 = 0.1032<br>wR2 = 0.2093     | R1 = 0.0603<br>wR2 = 0.1053    |
| R indices (all data)                            | R1 = 0.0617<br>wR2 = 0.1479    | R1 = 0.1369<br>wR2 = 0.1129     | R1 = 0.2253<br>wR2 = 0.2674     | R1 = 0.1786<br>wR2 = 0.1403    |
| Largest diff peak and hole (e·Å <sup>-3</sup> ) | 0.409 and -0.254               | 1.024 and -1.264                | 1.024 and -1.264                | 1.390 and -1.609               |

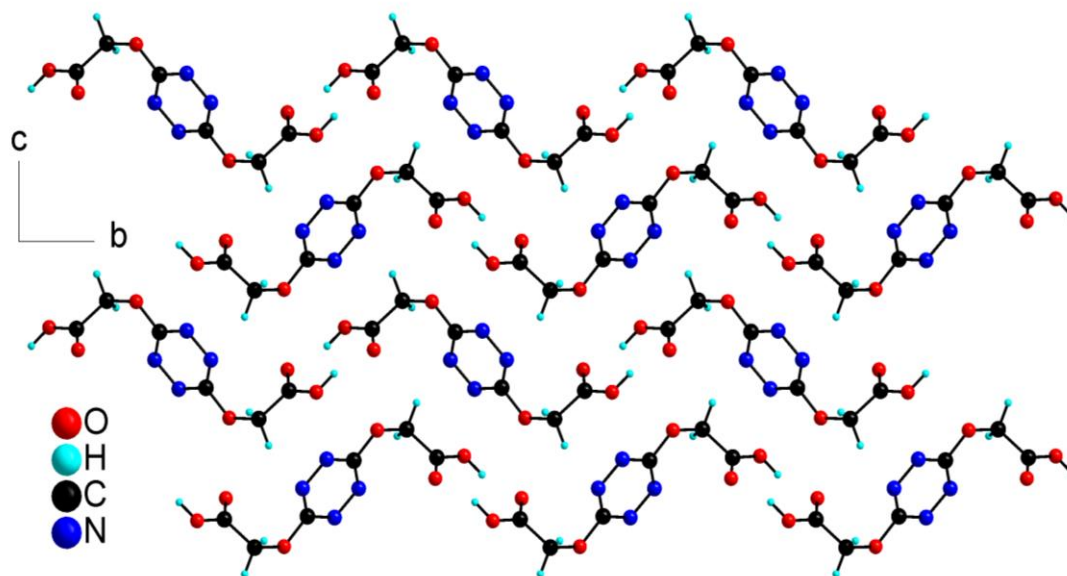

**Figure S7.** Crystal structure of H<sub>2</sub>OTz.

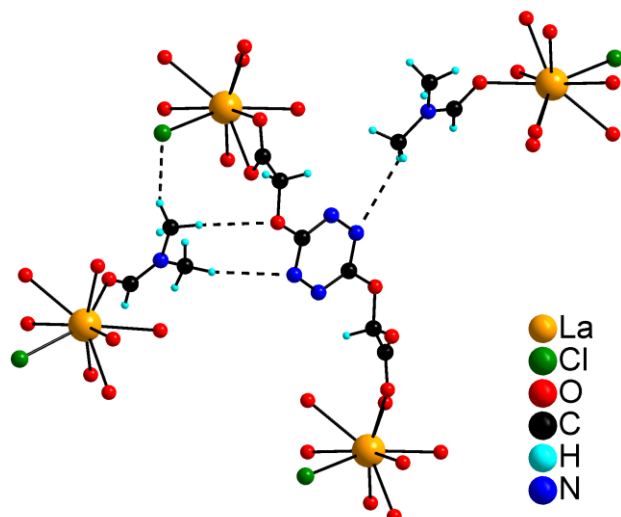

**Figure S8.** Short ( $< 3 \text{ \AA}$ ) intermolecular contacts in MIL-164(La).

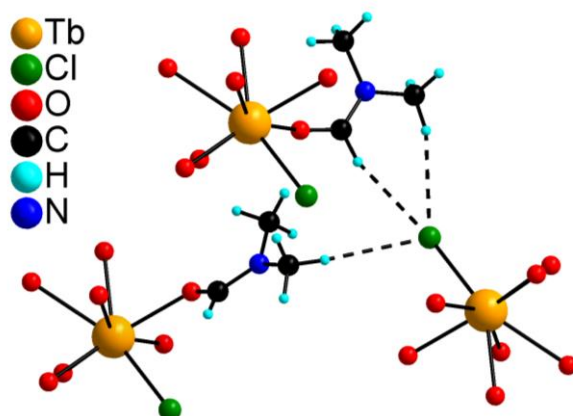

**Figure S9.** Short ( $< 3 \text{ \AA}$ ) intermolecular contacts in MIL-165(Tb).

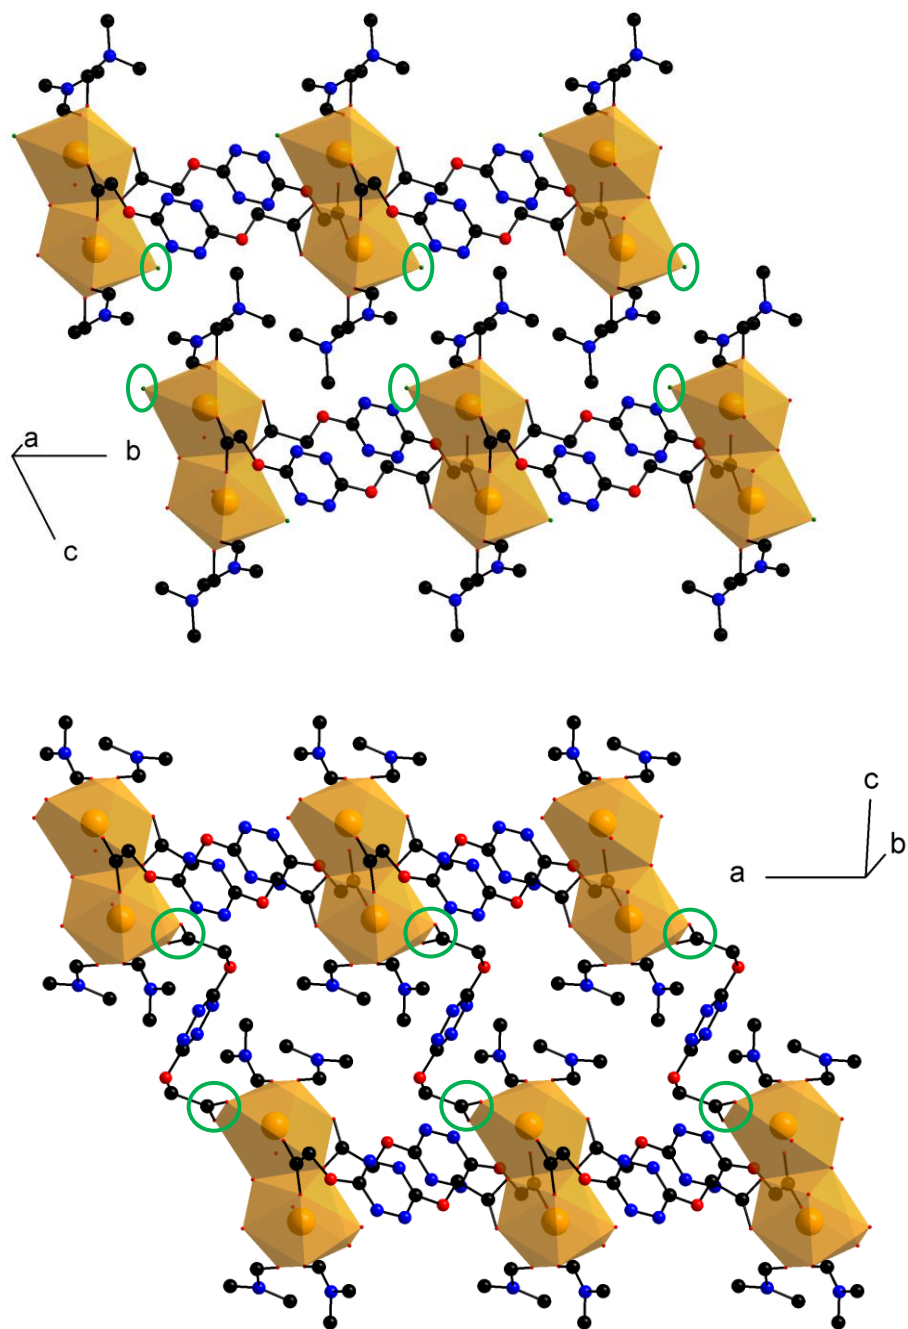

**Figure S10.** Relationship between the crystal structure of a) MIL-165(Tb) and b) MIL-166(Tb). Green circles highlight the substituted chloride ions and newly introduced carboxylate groups in MIL-165(Tb) and MIL-166(Tb) respectively. H atoms omitted for the sake of clarity.

**Table S2.** Geometry of OTz: bond distances (Å) and dihedral angles (°) in H<sub>2</sub>OTz, MIL-164, MIL-165 and MIL-166. \* Average value; # centrosymmetric molecule; § shortest distance. The low precision on the values related to MIL-165(Tb) and MIL-166(Tb) is associated with the poor quality of the diffraction datasets.

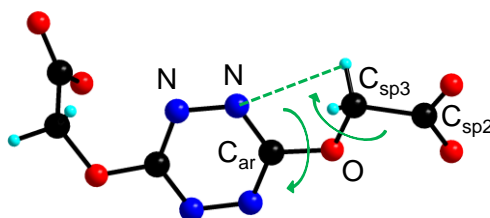

|                                     | N-N                  | N-C <sub>ar</sub>                            | C <sub>ar</sub> -O   | O-C <sub>sp3</sub>   | C <sub>sp3</sub> -C <sub>sp2</sub> | N...H <sup>§</sup> | N-C-O-C              | C-O-C-C            |
|-------------------------------------|----------------------|----------------------------------------------|----------------------|----------------------|------------------------------------|--------------------|----------------------|--------------------|
| <b>H<sub>2</sub>OTz<sup>#</sup></b> | 1.321(1)             | 1.334(1)<br>1.331(1)                         | 1.335(1)             | 1.429(1)             | 1.505(1)                           | 2.410              | 0.8(4)*              | 77.34(9)           |
| <b>MIL-164(La)</b>                  | 1.335(8)<br>1.322(7) | 1.334(8)<br>1.338(8)<br>1.317(8)<br>1.339(8) | 1.340(8)<br>1.342(8) | 1.429(8)<br>1.436(8) | 1.507(8)<br>1.521(8)               | 2.495<br>2.419     | 9.5(10)*<br>10.2(4)* | 67.9(7)<br>72.1(7) |
| <b>MIL-165(Tb)</b>                  | 1.31(3)<br>1.30(2)   | 1.32(3)<br>1.33(3)<br>1.33(3)<br>1.33(3)     | 1.34(3)<br>1.33(3)   | 1.38(3)<br>1.46(2)   | 1.53(3)<br>1.56(3)                 | 2.532<br>2.472     | 15(2)*<br>4(3)*      | 9(2)<br>68(3)      |
| <b>MIL-166(Tb)</b>                  |                      |                                              |                      |                      |                                    |                    |                      |                    |
| <b>Ligand A</b>                     | 1.32(1)<br>1.29(1)   | 1.34(1)<br>1.34(1)<br>1.32(1)<br>1.35(1)     | 1.32(1)<br>1.32(1)   | 1.43(1)<br>1.43(1)   | 1.50(1)<br>1.51(1)                 | 2.532<br>2.495     | 9(1)*<br>11(3)*      | 1(1)<br>64(1)      |
| <b>Ligand B<sup>#</sup></b>         | 1.32(2)              | 1.33(2)<br>1.32(2)                           | 1.33(1)              | 1.43(1)              | 1.54(2)                            | 2.428              | 10(8)*               | 66(2)              |

**Table S3.** Tb...Tb distances in MIL-165(Tb) and MIL-166(Tb).

|               | intra-dimer (Å) | inter-dimer (Å) | inter-chain (Å) |
|---------------|-----------------|-----------------|-----------------|
| MIL-165(Tb)   | 3.971(3)        | 10.802(6)       | 8.251(5)        |
| MIL-166(Tb)   | 4.019(2)        | 10.177(3)       | 11.126(4)       |
| variation (%) | -1.2            | 5.8             | 34.8            |

### 3. Infrared (IR) spectroscopy

Room temperature IR spectra (Figures S11, S12 and S13) were collected on a Nicolet Magna-IR 6700 Thermo Scientific spectrometer between 500 and 4000  $\text{cm}^{-1}$ .

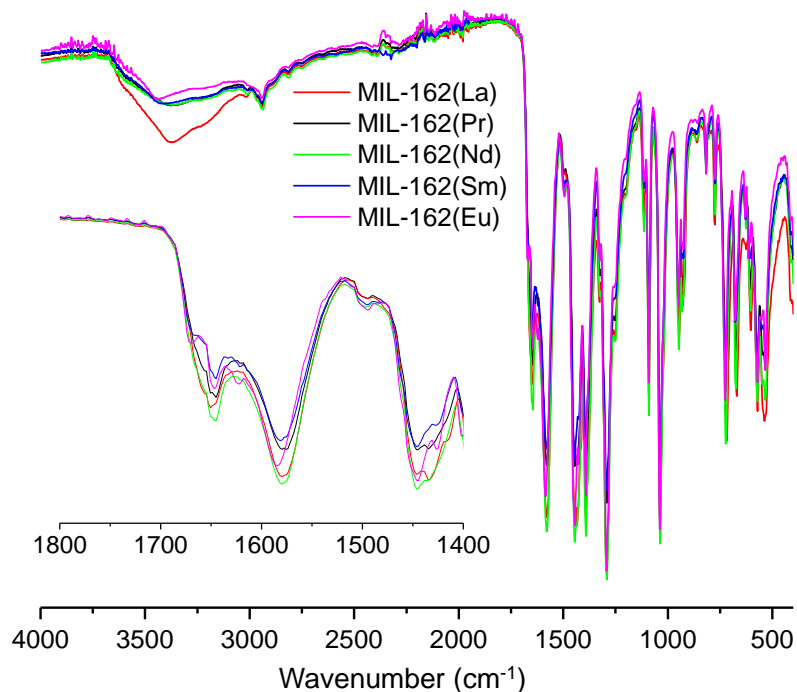

**Figure S11.** IR spectra of the as-synthesized MIL-162(Ln) (Ln = La, Pr, Nd, Eu). Inset: zoom on the 1800-1400  $\text{cm}^{-1}$  region.

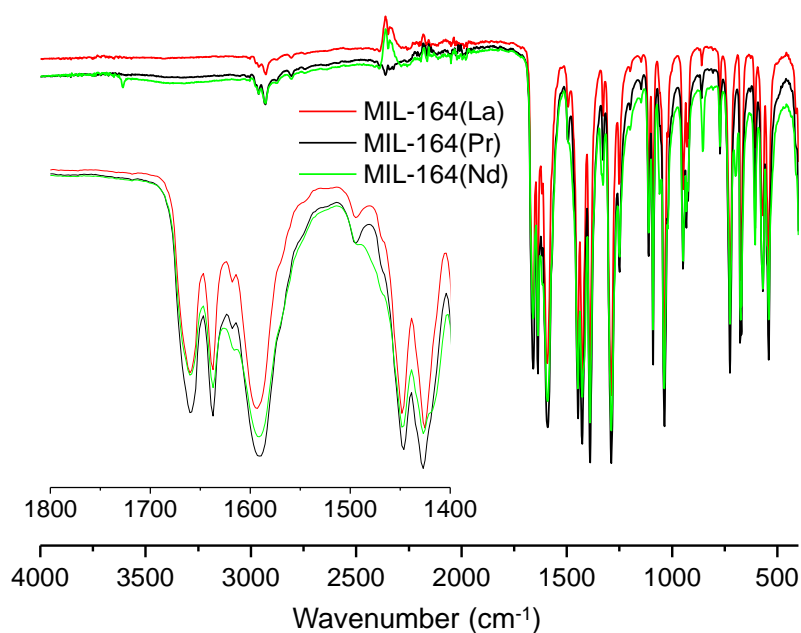

**Figure S12.** IR spectra of MIL-164(Ln) (Ln = La, Pr, Nd). Inset: zoom on the 1800-1400  $\text{cm}^{-1}$  region.

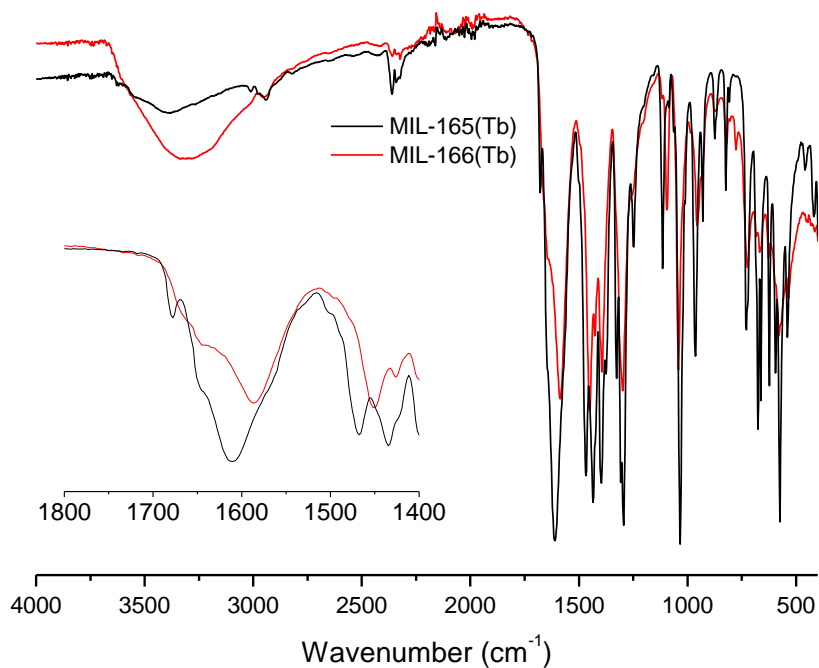

**Figure S13.** IR spectra of MIL-165(Tb) and MIL-166(Tb). Inset: zoom on the 1800-1400  $\text{cm}^{-1}$  region.

#### 4. Thermogravimetric analysis (TGA)

TGA (Figure S14) was performed on Mettler Toledo TGA/DSC 1, STAR®System apparatus under  $\text{O}_2$  atmosphere, at a heating rate of  $3\text{ }^\circ\text{C min}^{-1}$  up to  $600\text{ }^\circ\text{C}$ . Experimental and theoretical weight losses extracted from the proposed formula are summarized in Table S4.

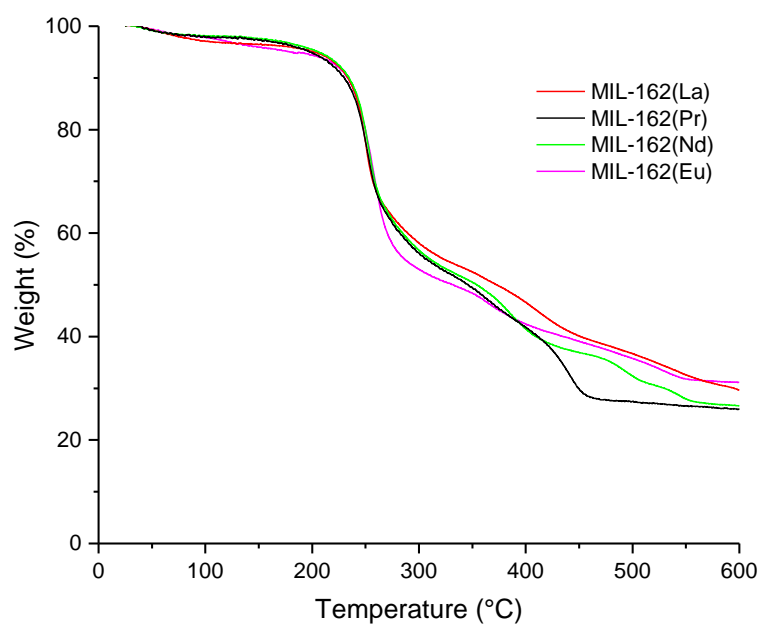

**Figure S14.** TGA of MIL-162(Ln), Ln = La, Pr, Nd, Eu.

**Table S4.** Experimental and theoretical remaining weight at 600°C for MIL-162(Ln) or  $\text{Ln}_2(\text{OTz})_3(\text{DMF})_n$ . Calculations were carried out for both  $n = 2$  and  $n = 4$  assuming that the final products are  $\text{Ln}_2\text{O}_3$ .

| Ln | Measured | Calculated (n = 4) | Calculated (n = 2) |
|----|----------|--------------------|--------------------|
| La | 29.7     | 25.8               | 29.4               |
| Pr | 25.9     | 26.1               | 29.6               |
| Nd | 26.6     | 26.5               | 30.1               |
| Eu | 31.2     | 27.4               | 31.0               |

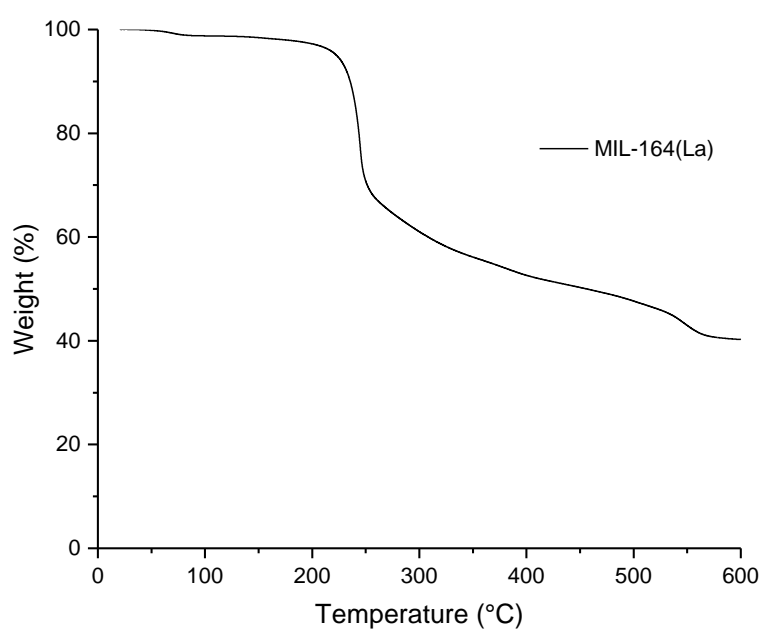

**Figure S15.** TGA of MIL-164(La).

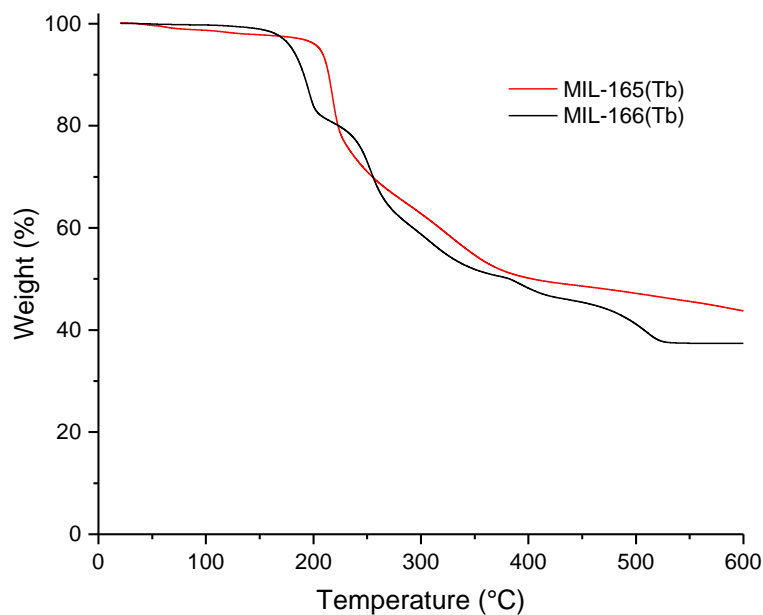

**Figure S16.** TGA of MIL-165(Tb) and MIL-166(Tb).

## 5. Elemental analysis

Chemical analysis were carried out at the ‘Institut de Chimie des Substances Naturelles’ (Gif sur Yvette, France).

- MIL-162(La) or  $\text{La}(\text{C}_6\text{H}_4\text{N}_4\text{O}_6)_{1.5}(\text{C}_3\text{H}_7\text{NO})$ . Exp. wt. C 24.1 %, H 2.8 %, N 16.7 %; Calc. wt. C 26.0 %, H 2.4 %, N 17.7 %.

- MIL-164(La) or  $\text{LaCl}(\text{C}_6\text{H}_4\text{N}_4\text{O}_6)(\text{C}_3\text{H}_7\text{NO})_2$ . Exp. wt. C 25.3 %, H 3.3 %, N 15.0 %; Calc. wt. C 26.3 %, H 3.3 %, N 15.3 %.

- MIL-165(Tb) or  $\text{TbCl}(\text{C}_6\text{H}_4\text{N}_4\text{O}_6)(\text{C}_3\text{H}_7\text{NO})_2$ . Exp. wt. C 22.6 %, H 3.0 %, N 13.6 %; Calc. wt. C 25.3 %, H 3.2 %, N 14.8 %.

- MIL-166(Tb) or  $\text{Tb}(\text{C}_6\text{H}_4\text{N}_4\text{O}_6)_{1.5}(\text{C}_3\text{H}_7\text{NO})_2$ . Exp. wt. C 27.1 %, H 3.3 %, N 16.2 %; Calc. wt. C 27.8 %, H 3.1 %, N 17.3 %.



## 6. Optical experiments

### - General conditions

For all solids (MIL-162 to MIL-166), an ethanolic suspension with a concentration of  $0.22 \text{ g L}^{-1}$  was prepared. The suspensions were stirred within the quartz cell during the measurement to insure their homogeneity. The properties of the free  $\text{H}_2\text{OTz}$  ligand were evaluated from solution with optical densities  $<0.1$  at the excitation wavelength and below, in order to avoid reabsorption artifacts, in ethanol. The UV-Vis absorption spectrum of  $\text{H}_2\text{OTz}$  (Figure S15) was measured on a Varian CARY 5000 spectrophotometer. Emission spectra were measured on a Fluorolog-3 (Horiba Jobin-Yvon) spectrofluorimeter. A right-angle configuration was used. Absolute quantum yields measurements of coordination polymers suspensions were performed using an integrating sphere (Horiba Jobin-Yvon).

### - UV-Vis absorption and steady state fluorescence

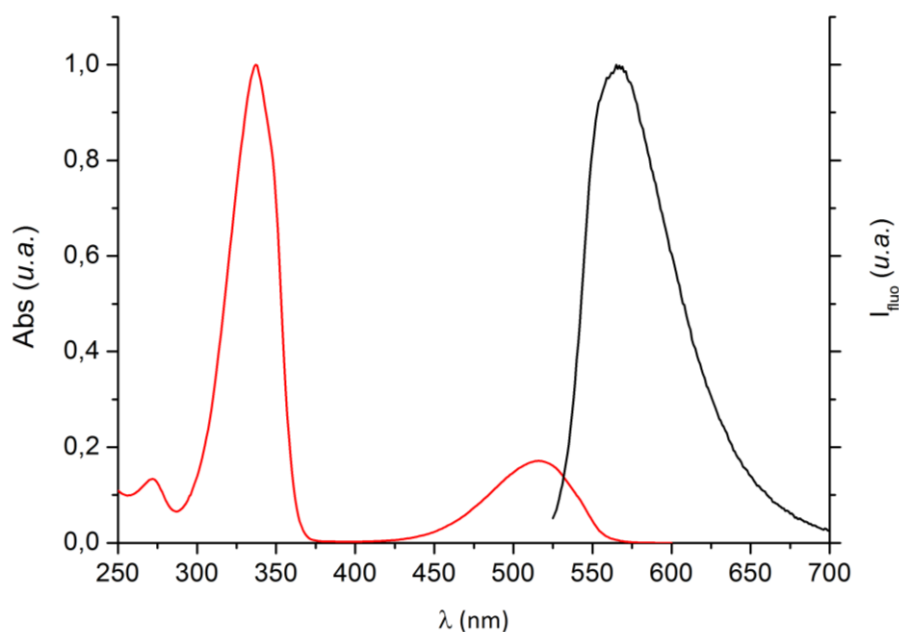

**Figure S17.** UV-visible absorption spectrum of  $\text{H}_2\text{OTz}$  (red) and emission spectrum (black) after excitation at 520 nm.

### Time resolved fluorescence

The fluorescence decay curve of H<sub>2</sub>OTz (Figure S16) was obtained with the time-correlated single-photon-counting method using a Spectra-Physics titanium-sapphire Tsunami laser pumped by a Millennia Xs laser (82 MHz, repetition rate lowered to 4 MHz thanks to a pulse-picker, around 500 fs pulse width, a doubling crystal is used to reach 409 nm excitation). Fluorescence photons are detected at 90°, through a long pass filter and a monochromator, with a Hamamatsu MCP photomultiplier R3809U. The data were acquired using a SPC-630 TCSPC system (Becker & Hickl GmbH). The analysis is performed with the Globals software from Laboratory for Fluorescence Dynamics (LFD) at the University of Illinois at Urbana-Champaign. The decay curve of H<sub>2</sub>OTz  $I(t)$  could satisfactorily be fitted by the following exponential curve, leading to a life time  $\tau = 76$  ns.

$$I(t) = A \cdot \exp\left(-\frac{t}{\tau}\right)$$

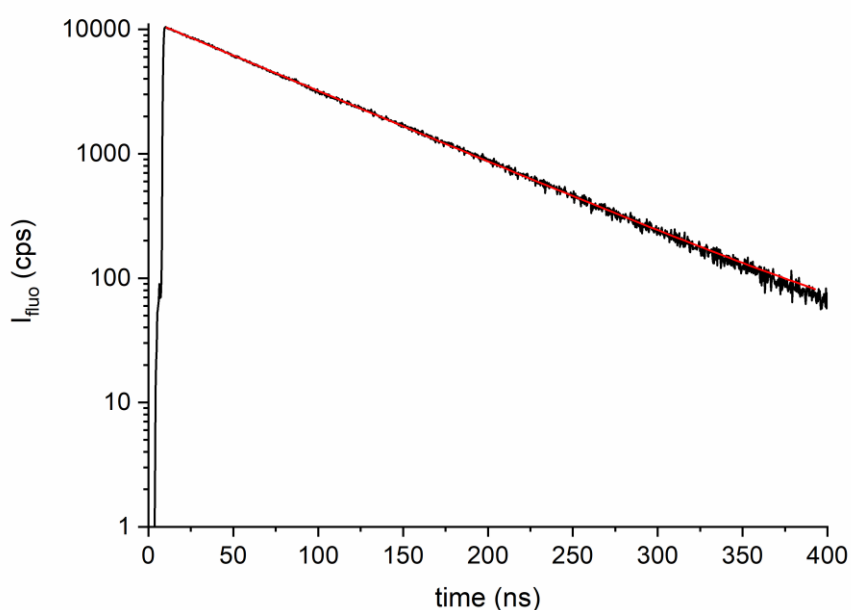

**Figure S18.** Experimental (black) and calculated (red) fluorescence decay curves of H<sub>2</sub>OTz in ethanol.

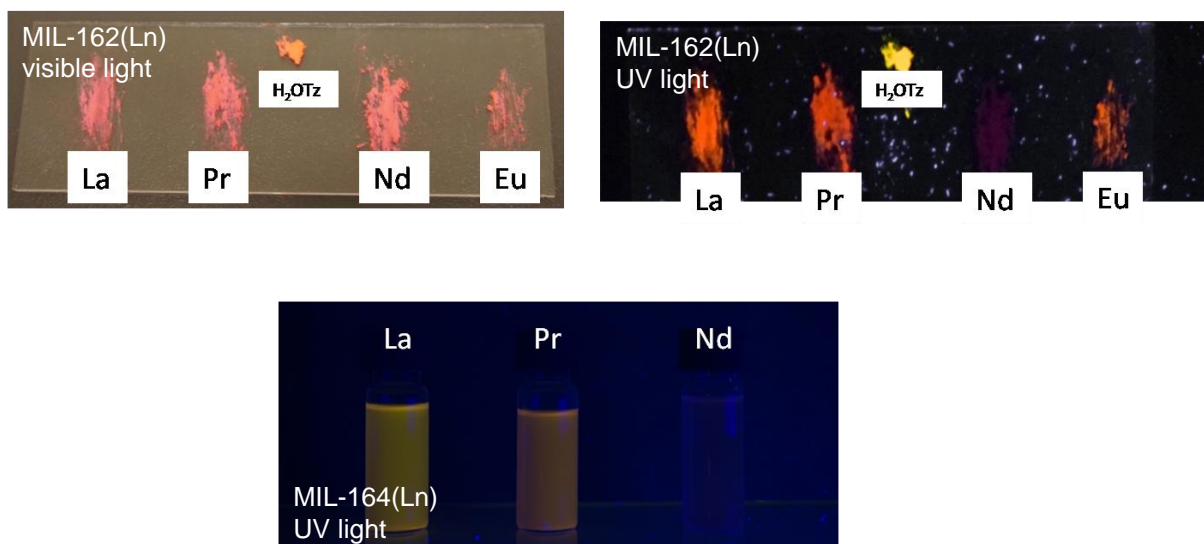

**Figure S19.** Top: picture of powdered H<sub>2</sub>OTz and MIL-162(Ln) (Ln = La, Pr, Nd, Eu) deposited on a glass slice under visible (left) and UV (365 nm, right) light irradiation; bottom: picture of MIL-164(Ln) (Ln =La, Pr, Nd) suspended in ethanol under UV (365 nm) light irradiation.

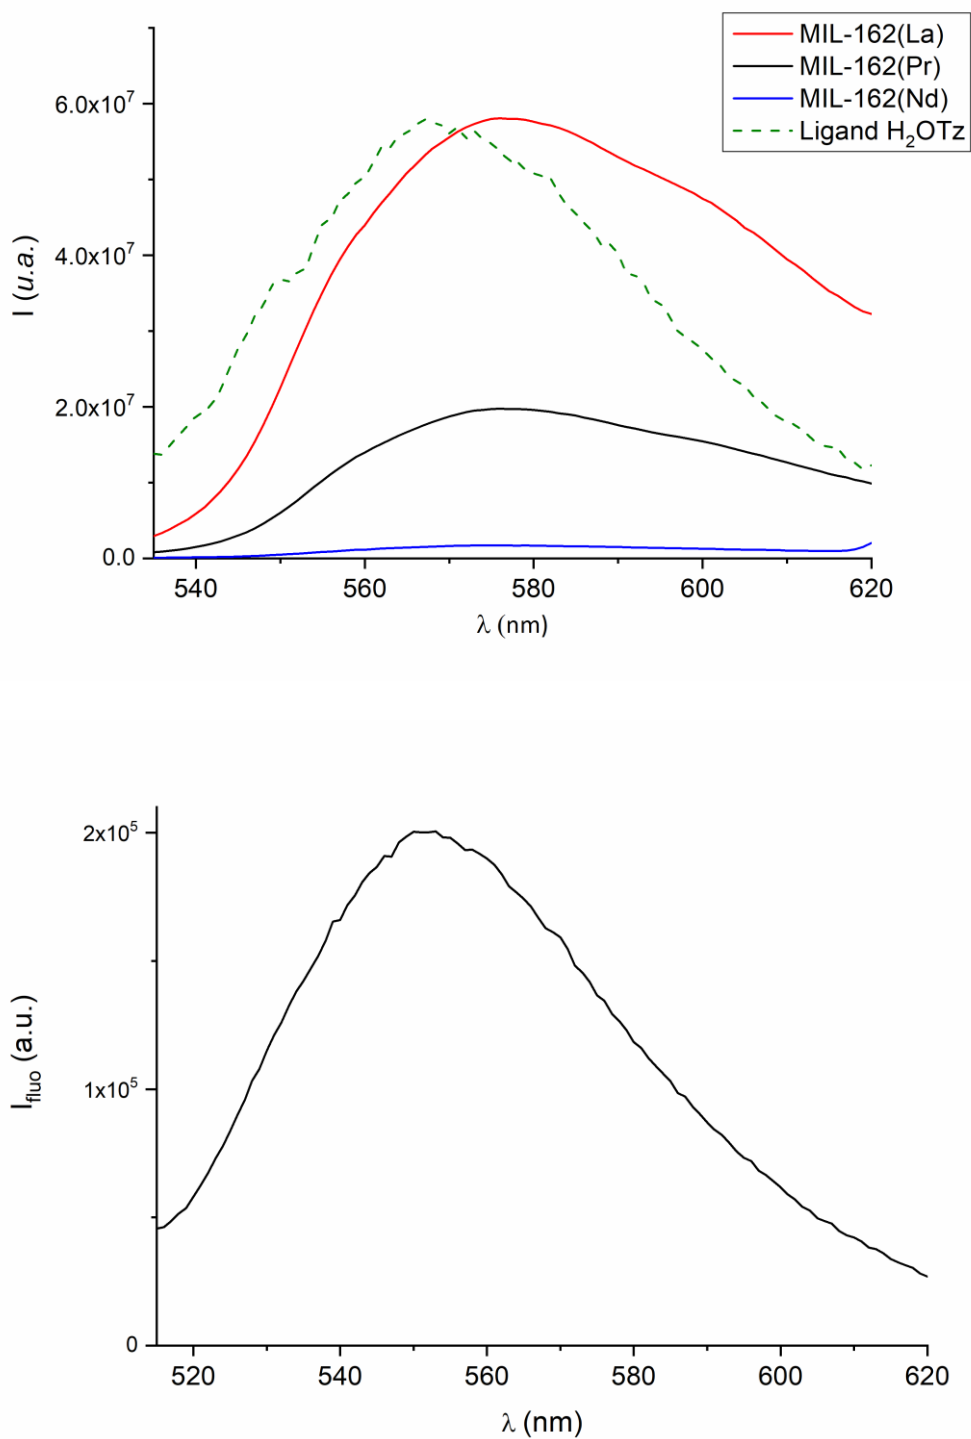

**Figure S20.** Fluorescence emissions spectra of MIL-162(Ln) solids in ethanol suspensions compared with the one of H<sub>2</sub>OTz in the powder state (top) and of MIL-165(Tb) in ethanol suspension (bottom). Excitation wavelength 320 nm.

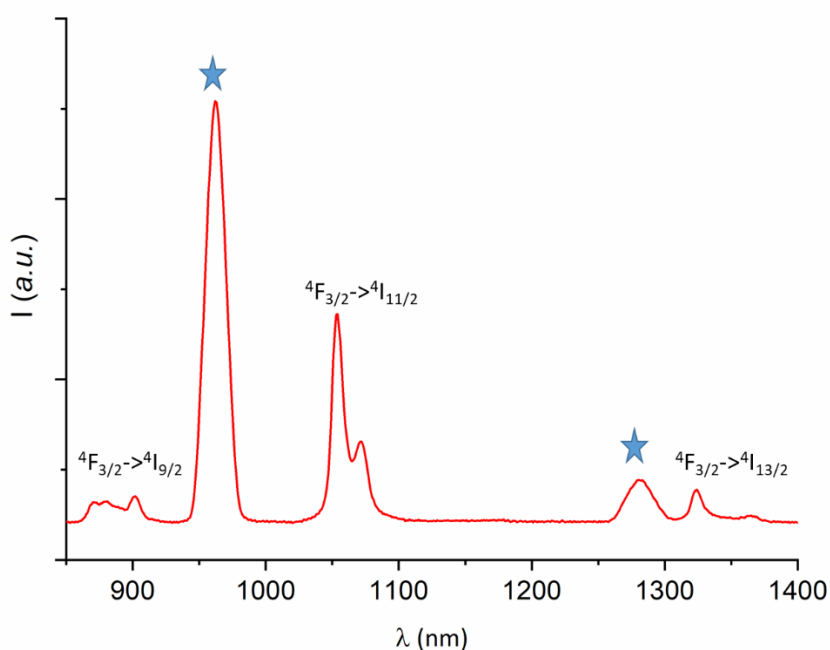

**Figure S21.** Fluorescence emission spectrum in the near IR region of a suspension of MIL-164(Nd). The stars indicate third and fourth harmonics of the excitation wavelength (320 nm).

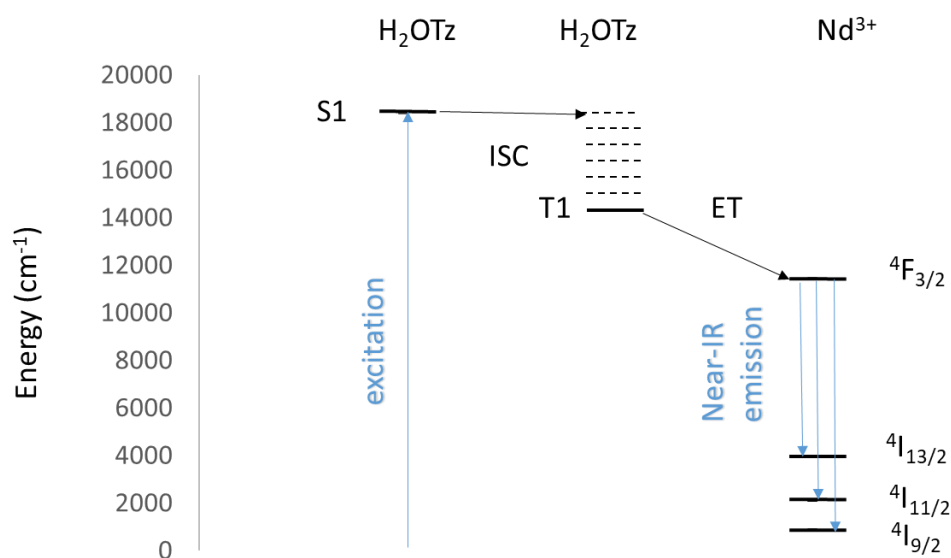

**Figure S22.** Schematic energy transfer diagram from the tetrazine OTz to the  $\text{Nd}^{3+}$  cation

## References

- [1] J. Jurayj, M. Cushman, *Tetrahedron* **1992**, *48*, 8601–8614.
- [2] M. D. Helm, A. Plant, J. P. A. Harrity, *Org. Biomol. Chem.* **2006**, *4*, 4278–4280.
- [3] G. M. Sheldrick, *Acta Crystallogr. Sect. C Struct. Chem.* **2015**, *71*, 3–8.
- [4] A. L. Spek, *Acta Crystallogr. Sect. C Struct. Chem.* **2015**, *71*, 9–18.
